# Supplementary material for: First use of p-tert-butylcalix[4]arene-tetra-O-acetate as a nanoreactor having tunable selectivity towards cross azo-compounds by trapping silver ions
Source: Royal Society of Chemistry journal article supplement (doi:10.1039/c5gc01859e), 2015-08-25

## SUPPLEMENTARY SECTION-1

### **First use of p-tert-butylcalix[4]arene-tetra-O-acetate as nanoreactor having tunable selectivity towards cross azo-compounds by trapping silver ion**

Piyali Sarkar<sup>†</sup> and Chhanda Mukhopadhyay<sup>\*†</sup>

<sup>†</sup> Department of Chemistry, University of Calcutta, 92 APC Road, Kolkata-700009, India; Tel: +91 9433019610;

\*E-mail: cmukhop@yahoo.co.in

## Contents:

### A. Experimental Section:

1. General methods.....S3
2. Synthesis of p-tert-butylcalix[4]arene.....S3
3. Synthesis of p-tert-Butylcalix[4]arene-tetra-O-acetate.....S3
4. General procedure for the synthesis of cross azo-compounds  
(all entries of Scheme 3).....S3
5. General procedure for the synthesis of homo azo-compounds  
(all entries of Scheme 4).....S3
6. Spectral and Analytical Data of the cross-products.....S3-S7
7. Spectral and Analytical Data of the homo-products.....S7-S8
8.  $^1\text{H}$  and  $^{13}\text{C}$  -NMR spectra of the cavitand  
p-tert-Butylcalix[4]arene-tetra-O-acetate.....S9
9. **Corresponding 1H-NMRs of Fig. 1 (Manuscript)** [Stacked 1H NMR spectra  
( $\text{CDCl}_3$ , room temperature; 303 K) of the guest *p*-toluidine, the host  
calix[4]acetate, and silver ion with *p*-toluidine  $\subset$  calix[4]acetate].....S10-S11
10.  $^1\text{H}$  and  $^{13}\text{C}$  NMR and TEM of recovered catalyst after five times recycled....S12-S13

## A. Experimental Section

**1. General methods:**  $^1\text{H}$  and  $^{13}\text{C}$  spectra were obtained on Bruker 300 MHz instrument at 300 MHz and 75 MHz respectively. DEPTQ-135 experiments were performed on Bruker 300 MHz instrument at 75 MHz. Chemical shifts are reported in parts per million (ppm) downfield from an internal TMS (tetramethylsilane) reference. Coupling constants ( $J$ ) are reported in hertz (Hz), and spin multiplicities are represented by the symbols s (singlet), br s (broad singlet), d (doublet), t (triplet), q (quartet) and m (multiplet). IR spectra were recorded on a Perkin Elmer Spectrophotometer RX / FT- IR system. Band positions are reported in reciprocal centimeters ( $\text{cm}^{-1}$ ). The CHN analyses were carried out on a 2400 Series II CHNS Analyzer, Perkin Elmer USA. Melting points were determined on an electrical melting point apparatus with an open capillary. The progress of the reaction was checked by TLC using 300-400 mesh silica gel. Column chromatography was performed using 60-120 mesh silica gel. All the available reagents were purchased from commercial sources and used without purification. All the solvents used during reactions were distilled for purity. Sizes of *p*-tert-butylcalix[8]arene particles in aqueous solution were determined by Beckman Coulter Delsa<sup>™</sup> Nano C particle analyser instrument and the SEM images were taken by CARL ZEISS EVO18.

### 2. Synthesis of *p*-tert-butylcalix[4]arene:

*p*-tert-Butylcalix[4]arene was synthesized from the mixture of *p*-tert-butylphenol (2 g, 13.32 mmol), 37% formaldehyde solution (1.24 mL, 16.6 mmol of HCHO), and NaOH (240 mg, 0.6 mmol) according to our reported procedure [Ref].

### 3. Synthesis of *p*-tert-Butylcalix[4]arene-tetra-O-acetate:

*p*-tert-Butylcalix[4]arene (200mg, 0.3 mmol) was dissolved in 1 ml acetic anhydride and refluxed for 3 hours. After completion of the reaction the mixture was poured into crashed ice and the filtered followed by washing with cold water. Then the product was crystallized from  $\text{CHCl}_3$ , 235 mg, 95.92% was gained. mp. above 300 °C; IR (KBr,  $\nu$   $\text{cm}^{-1}$ ): 2972, 2863, 2368, 1676, 1498, 1356, 1206, 1107, 1044.  $^1\text{H}$  NMR (300 MHz,  $\text{CDCl}_3$ ):  $\delta$  1.26-1.28 (m, 36H,  $-\text{CH}_3$ ), 1.43 (s, 12H,  $-\text{COCH}_3$ ), 3.67 (s, 8H,  $-\text{CH}_2$ ), 7.06 (s, 36H, Ar-H);  $^{13}\text{C}$  NMR (75 MHz,  $\text{CDCl}_3$ ):  $\delta$  20.6, 31.6, 34.4, 38.3, 125.8, 132.4, 146.1, 147.5, 168.0; HRMS (ESI-TOF)  $m/z$ :  $[\text{M} + \text{Na}]^+$  Calcd for  $[\text{C}_{52}\text{H}_{64}\text{O}_8\text{Na}]$ : 839.4493. Found 839.4490. Anal. calcd. for  $\text{C}_{52}\text{H}_{64}\text{O}_8$ ; C: 76.44; H: 7.90. Found: C: 76.49; H: 7.92.

### 4. General procedure for the synthesis of cross azo-compounds (all entries of Scheme 3):

Equivalent amount (1 mmol) of two different amines were stirred with calix[4]acetate (16.3 mg, 2 mol%) in 2 ml water for 5 min. and  $\text{AgNO}_3$  (8.5 mg, 5 mol%) was added in dark condition and stirred at 60 °C for 1 h. Then the organic part was separated by filtration and the crude was treated for column chromatography. We got the pure products using petroleum ether as eluent and the pure cavitand at 5% ethyl acetate in petroleum ether.

### 5. General procedure for the synthesis of homo azo-compounds (all entries of Scheme 4):

Above procedure is fully applicable for the synthesis of the homo coupled product, just by starting with only one single amine.

Ref: P. Sarkar, S. Maiti, K. Ghosh, S. Sengupta (Bandyopadhyay), R. J. Butcher and C. Mukhopadhyay, *Tetrahedron Letters*, 2014, **55**, 996–1001;

## 6. Spectral and Analytical Data of the cross-products:

**(E)-1-(4-Bromophenyl)-p-tolyldiazene (4a):** Orange solid (88%), mp. 166 °C (CDCl<sub>3</sub>); IR (KBr,  $\nu$  cm<sup>-1</sup>): 2969, 2932, 2859, 2250, 1578, 1405, 1397, 1258, 1106, 1032, 965; <sup>1</sup>H NMR (300 MHz, CDCl<sub>3</sub>):  $\delta$  2.36 (s, 3H, -CH<sub>3</sub>), 7.24 (d, J = 7.8 Hz, 2H, Ar-H), 7.56-7.59 (m, 2H, Ar-H), 7.69-7.80 (m, 4H, Ar-H); <sup>13</sup>C NMR (75 MHz, CDCl<sub>3</sub>):  $\delta$  21.5, 123.0, 124.2, 125.0, 129.8, 132.3, 142.0, 150.7, 151.5; HRMS (ESI-TOF) m/z: [M + Na]<sup>+</sup> Calcd for [C<sub>13</sub>H<sub>11</sub>BrN<sub>2</sub>Na]: 297.0003. Found 297.0005. Anal. calcd. for C<sub>13</sub>H<sub>11</sub>BrN<sub>2</sub>; C: 56.75; H: 4.03; N: 10.18. Found: C: 56.79; H: 4.01; N: 10.15.

**(E)-1-(4-Chlorophenyl)-p-tolyldiazene (4b):** Reddish yellow solid (87%), mp. 252 °C (CDCl<sub>3</sub>); IR (KBr,  $\nu$  cm<sup>-1</sup>): 2950, 2366, 1715, 1677, 1478, 1345, 1281, 992; <sup>1</sup>H NMR (300 MHz, CDCl<sub>3</sub>):  $\delta$  2.45 (s, 3H, -CH<sub>3</sub>), 7.34 (d, J = 8.1 Hz, 2H, Ar-H), 7.51 (d, J = 8.7 Hz, 2H, Ar-H), 7.84-7.91 (m, 4H, Ar-H); <sup>13</sup>C NMR (75 MHz, CDCl<sub>3</sub>):  $\delta$  151.1, 150.6, 141.9, 136.6, 129.8, 129.3, 124.0, 122.9, 21.6; Anal. calcd. for C<sub>13</sub>H<sub>11</sub>ClN<sub>2</sub>; C: 67.68; H: 4.81; N: 12.14. Found: C: 67.71; H: 4.79; N: 12.11.

**1-(4-Nitrophenyl)-2-p-tolyldiazene (4c):** Yellow solid (89%), mp. 174 °C (CDCl<sub>3</sub>); IR (KBr,  $\nu$  cm<sup>-1</sup>): 1604, 1590, 1527, 1342, 1299, 1129, 1099, 858; <sup>1</sup>H NMR (300 MHz, CDCl<sub>3</sub>):  $\delta$  2.36 (s, 3H, -CH<sub>3</sub>), 7.25 (d, J = 8.1 Hz, 2H, Ar-H), 7.78 (d, J = 8.1 Hz, 2H, Ar-H), 7.92 (d, J = 8.7 Hz, 2H, Ar-H), 8.28 (d, J = 8.7 Hz, 2H, Ar-H); <sup>13</sup>C NMR (75 MHz, CDCl<sub>3</sub>):  $\delta$  21.6, 123.1, 123.2, 124.5, 129.6, 143.1, 148.3, 150.4, 155.6; Anal. calcd. for C<sub>13</sub>H<sub>11</sub>N<sub>3</sub>O<sub>2</sub>; C: 64.72; H: 4.60; N: 17.42. Found: C: 64.79; H: 4.58; N: 17.40.

**1-(3-Nitrophenyl)-2-p-tolyldiazene (4d):** Orange solid (88%), mp. 112 °C (CDCl<sub>3</sub>); IR (KBr,  $\nu$  cm<sup>-1</sup>): 1610, 1580, 1499, 1352, 1155, 1076, 932; <sup>1</sup>H NMR (300 MHz, CDCl<sub>3</sub>):  $\delta$  2.42 (s, 3H, -CH<sub>3</sub>), 7.33 (d, J = 8.4 Hz, 2H, Ar-H), 7.69 (t, J = 8.1 Hz, 1H, Ar-H), 7.84 (d, J = 8.4 Hz, 2H, Ar-H), 8.21 (d, J = 8.1 Hz, 1H, Ar-H), 8.27 (d, J = 8.1 Hz, 1H, Ar-H), 8.70 (s, 1H, Ar-H); <sup>13</sup>C NMR (75 MHz, CDCl<sub>3</sub>):  $\delta$  21.6, 116.9, 123.3, 129.0, 129.9, 129.9, 143.0, 149.0, 150.3, 153.1; Anal. calcd. for C<sub>13</sub>H<sub>11</sub>N<sub>3</sub>O<sub>2</sub>; C: 64.72; H: 4.60; N: 17.42. Found: C: 64.69; H: 4.59; N: 17.39.

**Ethyl 4-(p-Tolyldiazanyl)benzoate (4e):** Orange solid (86%), mp. 102 °C (CDCl<sub>3</sub>); IR (KBr,  $\nu$  cm<sup>-1</sup>): 2928, 1723, 1596, 1244, 1095, 1085; <sup>1</sup>H NMR (300 MHz, CDCl<sub>3</sub>):  $\delta$  1.32 (t, J = 7.0 Hz, 3H, -CH<sub>3</sub>), 2.34 (s, 3H, -CH<sub>3</sub>), 4.33 (q, J = 7.0 Hz, 2H, -OCH<sub>2</sub>), 7.24 (d, J = 8.4 Hz, 2H, Ar-H), 7.76 (d, J = 8.4 Hz, 2H, Ar-H), 7.83 (d, J = 8.7 Hz, 2H, Ar-H), 8.11 (d, J = 8.7 Hz, 2H, Ar-H); <sup>13</sup>C NMR (75 MHz, CDCl<sub>3</sub>):  $\delta$  14.4, 21.6, 61.2, 122.4, 123.1, 129.7, 130.4, 131.7, 142.4, 150.6, 155.1, 165.9; Anal. calcd. for C<sub>16</sub>H<sub>16</sub>N<sub>2</sub>O<sub>2</sub>; C: 71.62; H: 6.01; N: 10.44. Found: C: 71.58; H: 6.03; N: 10.49.

**1-(4-Acetylphenyl)-2-p-tolyldiazene (4f):** red solid (85%), mp. 132 °C (CDCl<sub>3</sub>); IR (KBr,  $\nu$  cm<sup>-1</sup>): 1672, 1600, 1349, 1266, 1011, 974; <sup>1</sup>H NMR (300 MHz, CDCl<sub>3</sub>):  $\delta$  2.26 (s, 3H, -CH<sub>3</sub>), 2.48 (s, 3H, -CH<sub>3</sub>), 7.25 (d, J = 8.4 Hz, 2H, Ar-H), 7.74 (d, J = 8.4 Hz, 2H, Ar-H), 7.89 (d, J = 8.7 Hz, 2H, Ar-H), 8.16 (d, J = 8.7 Hz, 2H, Ar-H); <sup>13</sup>C NMR (75 MHz, CDCl<sub>3</sub>):  $\delta$  21.6, 26.8, 122.7, 123.1, 129.3, 129.8, 138.2, 142.6, 150.7, 155.1, 197.5; Anal. calcd. for C<sub>15</sub>H<sub>14</sub>N<sub>2</sub>O; C: 75.61; H: 5.92; N: 11.76. Found: C: 75.69; H: 5.95; N: 11.74.

**1-(3-Chlorophenyl)-2-p-tolyldiazene (4g):** Orange solid (84%), mp. 100-101 °C (CDCl<sub>3</sub>); IR (KBr,  $\nu$  cm<sup>-1</sup>): 2930, 1732, 1602, 1444, 1271, 1066; <sup>1</sup>H NMR (300 MHz):  $\delta$  2.38 (s, 3H, -CH<sub>3</sub>), 7.24-7.38 (m, 4H, Ar-H), 7.73-7.83 (m, 4H, Ar-H); <sup>13</sup>C NMR (75 MHz, CDCl<sub>3</sub>):  $\delta$  21.6, 121.6, 122.3, 123.0, 129.8, 130.1, 130.4, 135.0, 142.2, 150.4, 153.5; Anal. calcd. for C<sub>13</sub>H<sub>11</sub>ClN<sub>2</sub>; C: 67.68; H: 4.81; N: 12.14. Found: C: 67.63; H: 4.82; N: 12.17.

**Ethyl 4-(o-tolyldiazanyl)benzoate (4h):** Reddish yellow solid (83%), mp. 157 °C (CDCl<sub>3</sub>); IR (KBr,  $\nu$  cm<sup>-1</sup>): 2988, 1719, 1601, 1273, 1105; <sup>1</sup>H NMR (300 MHz, CDCl<sub>3</sub>):  $\delta$  1.44 (t, J = 7.0 Hz, 3H, -CH<sub>3</sub>), 2.75 (s, 3H, -CH<sub>3</sub>), 4.43 (q, J = 7.1 Hz, 2H, -OCH<sub>2</sub>), 7.24-7.30 (m, 1H, Ar-H), 7.34-7.42 (m, 2H, Ar-H), 7.65 (d, J = 8.4 Hz, 1H, Ar-H), 7.95 (d, J = 8.4 Hz, 2H, Ar-H), 8.18 (d, J = 8.4 Hz, 2H, Ar-H); <sup>13</sup>C NMR (75 MHz, CDCl<sub>3</sub>):  $\delta$  166.1, 155.4, 150.6, 138.9, 131.9, 131.7, 131.4, 130.6, 126.4, 122.7, 115.4, 61.2, 17.5, 14.3; Anal. calcd. for C<sub>16</sub>H<sub>16</sub>N<sub>2</sub>O<sub>2</sub>; C: 71.62; H: 6.01; N: 10.44. Found: C: 71.66; H: 6.00; N: 10.41.

**Ethyl 4-(*m*-tolylidiazenyl)benzoate (4i):** Red solid (84%), mp. 136 °C (CDCl<sub>3</sub>); IR (KBr,  $\nu$  cm<sup>-1</sup>): 2931, 1720, 1601, 1265, 1100; <sup>1</sup>H NMR (300 MHz, CDCl<sub>3</sub>):  $\delta$  1.43 (t, J = 7.0 Hz, 3H, -CH<sub>3</sub>), 2.46 (s, 3H, -CH<sub>3</sub>), 4.42 (q, J = 7.0 Hz, 2H, -OCH<sub>2</sub>), 7.34 (d, J = 7.5 Hz, 1H, Ar-H), 7.43 (t, J = 8.0 Hz, 1H, Ar-H), 7.77 (d, J = 5.7 Hz, 2H, Ar-H), 7.94 (d, J = 8.7 Hz, 2H, Ar-H), 8.20 (d, J = 8.4 Hz, 2H, Ar-H); <sup>13</sup>C NMR (75 MHz, CDCl<sub>3</sub>):  $\delta$  166.0, 155.1, 152.6, 139.1, 132.5, 132.1, 130.5, 129.0, 123.2, 122.5, 120.7, 61.2, 21.3, 14.3; Anal. calcd. for C<sub>16</sub>H<sub>16</sub>N<sub>2</sub>O<sub>2</sub>; C: 71.62; H: 6.01; N: 10.44. Found: C: 71.60; H: 6.03; N: 10.48.

**(*E*)-2-(4-bromophenyl)-1-*m*-tolylidiazene (4j):** Orange solid (84%), mp. 166 °C (CDCl<sub>3</sub>); IR (KBr,  $\nu$  cm<sup>-1</sup>): 2962, 2930, 2863, 2248, 1576, 1470, 1393, 1264, 1100, 1065, 914; <sup>1</sup>H NMR (300 MHz, CDCl<sub>3</sub>):  $\delta$  2.44 (s, 3H, -CH<sub>3</sub>), 7.31 - 7.35 (m, 1H, Ar-H), 7.38 - 7.43 (m, 1H, Ar-H), 7.62 (d, J = 8.7 Hz, 2H, Ar-H), 7.69 - 7.72 (m, 2H, Ar-H), 7.81 (d, J = 8.7 Hz, 2H, Ar-H); <sup>13</sup>C NMR (75 MHz, CDCl<sub>3</sub>):  $\delta$  152.7, 151.3, 139.1, 132.3, 131.7, 128.9, 125.5, 124.3, 123.1, 122.9, 120.5, 21.4; Anal. calcd. for C<sub>13</sub>H<sub>11</sub>BrN<sub>2</sub>; C: 56.75; H: 4.03; N: 10.18. Found: C: 56.77; H: 4.01; N: 10.15.

**(*E*)-1-(4-chlorophenyl)-2-*m*-tolylidiazene (4k):** Orange solid (83%), mp. 98 °C (CDCl<sub>3</sub>); IR (KBr,  $\nu$  cm<sup>-1</sup>): 2965, 2930, 1633, 1385, 1257, 1075, 923; <sup>1</sup>H NMR (300 MHz, CDCl<sub>3</sub>):  $\delta$  2.42 (s, 3H, -CH<sub>3</sub>), 7.26 (d, J = 8.7 Hz, 1H, Ar-H), 7.37 (t, J = 8.7 Hz, 1H, Ar-H), 7.44 - 7.48 (m, 2H, Ar-H), 7.68 (d, J = 9.0 Hz, 2H, Ar-H), 7.83 (d, J = 8.7 Hz, 2H, Ar-H); <sup>13</sup>C NMR (75 MHz, CDCl<sub>3</sub>):  $\delta$  152.6, 151.1, 139.1, 136.7, 132.1, 129.3, 129.0, 124.1, 123.1, 120.5, 21.4; Anal. calcd. for C<sub>13</sub>H<sub>11</sub>ClN<sub>2</sub>; C: 67.68; H: 4.81; N: 12.14. Found: C: 67.71; H: 4.79; N: 12.11.

**Ethyl 4-(phenylidiazenyl)benzoate (4l):** Orange solid (89%), mp. 105 °C (CDCl<sub>3</sub>); IR (KBr,  $\nu$  cm<sup>-1</sup>): 2962, 1707, 1269, 1110, 932; <sup>1</sup>H NMR (300 MHz, CDCl<sub>3</sub>):  $\delta$  1.44 (t, J = 7.0 Hz, 3H, -CH<sub>3</sub>), 4.43 (q, J = 6.9 Hz, 2H, -OCH<sub>2</sub>), 7.50-7.56 (m, 3H, Ar-H), 7.93-7.97 (m, 4H, Ar-H), 8.18 (d, J = 8.4 Hz, 2H, Ar-H); <sup>13</sup>C NMR (75 MHz, CDCl<sub>3</sub>):  $\delta$  166.0, 155.1, 152.5, 132.1, 131.6, 130.5, 129.2, 123.1, 122.6, 61.2, 14.3; Anal. calcd. for C<sub>15</sub>H<sub>14</sub>N<sub>2</sub>O<sub>2</sub>; C: 70.85; H: 5.55; N: 11.02. Found: C: 70.83; H: 5.54; N: 11.00.

**(*E*)-2-(4-bromophenyl)-1-phenylidiazene (4m):** Reddish yellow solid (83%), mp. 176 °C (CDCl<sub>3</sub>); IR (KBr,  $\nu$  cm<sup>-1</sup>): 3061, 2963, 2927, 2859, 1573, 1477, 1395, 1392, 1291, 1103, 1021, 910; <sup>1</sup>H NMR (300 MHz, CDCl<sub>3</sub>):  $\delta$  7.38 - 7.46 (m, 3H, Ar-H), 7.57 - 7.61 (m, 2H, Ar-H), 7.72 - 7.76 (m, 2H, Ar-H), 7.83 - 7.88 (m, 2H, Ar-H); <sup>13</sup>C NMR (75 MHz, CDCl<sub>3</sub>):  $\delta$  152.6, 151.5, 132.3, 131.4, 130.3, 129.0, 125.4, 124.5, 122.9; Anal. calcd. for C<sub>12</sub>H<sub>9</sub>BrN<sub>2</sub>; C: 55.20; H: 3.47; N: 10.73. Found: C: 55.24; H: 3.44; N: 10.75.

**(*E*)-2-(4-chlorophenyl)-1-phenylidiazene (4n):** Reddish yellow solid (82%), mp. 65 °C (CDCl<sub>3</sub>); IR (KBr,  $\nu$  cm<sup>-1</sup>): 2968, 2933, 1629, 1384, 1265, 1088, 1034; <sup>1</sup>H NMR (300 MHz, CDCl<sub>3</sub>):  $\delta$  7.39 - 7.44 (m, 5H, Ar-H), 7.78 - 7.84 (m, 4H, Ar-H); <sup>13</sup>C NMR (75 MHz, CDCl<sub>3</sub>):  $\delta$  152.4, 150.9, 136.8, 131.2, 129.3, 129.3, 129.2, 129.1, 124.1, 124.1, 122.9, 122.8; Anal. calcd. for C<sub>12</sub>H<sub>9</sub>ClN<sub>2</sub>; C: 66.52; H: 4.19; N: 12.93. Found: C: 66.57; H: 4.21; N: 12.89.

**(*E*)-1-(4-bromophenyl)-2-(4-methoxyphenyl)diazene (4o):** Reddish yellow solid (85%), mp. 185 °C (CDCl<sub>3</sub>); IR (KBr,  $\nu$  cm<sup>-1</sup>): 2962, 2839, 1603, 1258, 1030, 913; <sup>1</sup>H NMR (300 MHz, CDCl<sub>3</sub>):  $\delta$  3.81 (s, 3H, -OCH<sub>3</sub>), 6.90 (d, J = 8.7 Hz, 2H, Ar-H), 7.51 (d, J = 8.7 Hz, 2H, Ar-H), 7.65 - 7.69 (m, 2H, Ar-H), 7.78 - 7.84 (m, 2H, Ar-H); <sup>13</sup>C NMR (75 MHz, CDCl<sub>3</sub>):  $\delta$  162.3, 151.5, 146.8, 132.2, 124.9, 124.5, 124.1, 114.2, 55.6; Anal. calcd. for C<sub>13</sub>H<sub>11</sub>BrN<sub>2</sub>O; C: 53.63; H: 3.81; N: 9.62. Found: C: 53.67; H: 3.83; N: 9.60.

**(*E*)-1-(4-Chlorophenyl)-2-(4-methoxyphenyl)diazene (4p):** Orange solid (85%), mp. 164 °C (CDCl<sub>3</sub>); IR (KBr,  $\nu$  cm<sup>-1</sup>): 2965, 1708, 1642, 1464, 1192, 1015, 991; <sup>1</sup>H NMR (300 MHz, CDCl<sub>3</sub>):  $\delta$  3.89 (s, 3H, -OCH<sub>3</sub>), 7.00 (d, J = 9.0 Hz, 2H, Ar-H), 7.46 (d, J = 8.7 Hz, 2H, Ar-H), 7.81 (d, J = 8.7 Hz, 2H, Ar-H), 7.89 (d, J = 8.7 Hz, 2H, Ar-H); <sup>13</sup>C NMR (75 MHz, CDCl<sub>3</sub>):  $\delta$  162.2, 151.1, 146.8, 136.1, 129.3, 124.8, 123.8, 114.2, 55.6; Anal. calcd. for C<sub>13</sub>H<sub>11</sub>ClN<sub>2</sub>O; C: 63.29; H: 4.49; N: 11.36. Found: C: 63.21; H: 4.44; N: 11.41.

**(*E*)-1-(4-Methoxyphenyl)-2-(4-nitrophenyl)diazene (4q):** Yellow solid (86%), mp. 189 °C (CDCl<sub>3</sub>); IR (KBr,  $\nu$  cm<sup>-1</sup>): 1623, 1501, 1203, 1100, 1015; <sup>1</sup>H NMR (300 MHz, CDCl<sub>3</sub>):  $\delta$  3.91 (s, 3H, -CH<sub>3</sub>), 7.00-7.05 (m, 2H, Ar-H), 7.93-8.01 (m, 4H, Ar-H), 8.45 (d, J = 8.7 Hz, 2H, Ar-H); <sup>13</sup>C NMR (75 MHz,

CDCl<sub>3</sub>):  $\delta$  163.2, 156.0, 148.2, 147.0, 125.6, 124.7, 123.1, 114.4, 55.7; Anal. calcd. for C<sub>13</sub>H<sub>11</sub>N<sub>3</sub>O<sub>3</sub>; C: 60.70; H: 4.31; N: 16.33. Found: C: 60.77; H: 4.33; N: 16.27.

**1-(4-Acetylphenyl)-2-(4-chlorophenyl)diazene (4r):** Orange solid (76%), mp. 150 °C (CDCl<sub>3</sub>); IR (KBr,  $\nu$  cm<sup>-1</sup>): 1675, 1480, 1399, 1340, 1260, 1088, 1001, 863; <sup>1</sup>H NMR (300 MHz, CDCl<sub>3</sub>):  $\delta$  2.64 (s, 3H, -CH<sub>3</sub>), 7.51 (d, J = 8.7 Hz, 2H, Ar-H), 7.89 (d, J = 8.7 Hz, 2H, Ar-H), 7.96 (d, J = 8.7 Hz, 2H, Ar-H), 8.10 (d, J = 8.7 Hz, 2H, Ar-H); <sup>13</sup>C NMR (75 MHz, CDCl<sub>3</sub>):  $\delta$  26.8, 122.9, 124.4, 129.4, 129.5, 137.7, 138.5, 150.7, 154.8, 197.3; Anal. calcd. for C<sub>14</sub>H<sub>11</sub>ClN<sub>2</sub>O; C: 65.00; H: 4.29; N: 10.83. Found: C: 65.01; H: 4.33; N: 10.80.

**1-(4-Acetylphenyl)-2-(4-bromophenyl)diazene (4s):** Orange solid (75%), mp. 168 °C (CDCl<sub>3</sub>); IR (KBr,  $\nu$  cm<sup>-1</sup>): 2925, 1666, 1348, 1268, 1062, 998; <sup>1</sup>H NMR (300 MHz, CDCl<sub>3</sub>):  $\delta$  2.65 (s, 3H, -CH<sub>3</sub>), 7.64 (d, J = 8.7 Hz, 2H, Ar-H), 7.81 (d, J = 8.7 Hz, 2H, Ar-H), 7.94 (d, J = 8.7 Hz, 2H, Ar-H), 8.07 (d, J = 8.7 Hz, 2H, Ar-H); <sup>13</sup>C NMR (75 MHz, CDCl<sub>3</sub>):  $\delta$  26.9, 123.0, 124.6, 126.3, 129.3, 132.4, 138.5, 151.2, 154.7, 197.4; Anal. calcd. for C<sub>14</sub>H<sub>11</sub>BrN<sub>2</sub>O; C: 55.47; H: 3.66; N: 9.24. Found: C: 55.50; H: 3.68; N: 9.21.

**1-(4-Acetylphenyl)-2-(4-nitrophenyl)diazene (4t):** Red solid (73%), mp. 156 °C (CDCl<sub>3</sub>); IR (KBr,  $\nu$  cm<sup>-1</sup>): 1683, 1700, 1529, 1344, 1259, 1210, 1111; <sup>1</sup>H NMR (300 MHz, CDCl<sub>3</sub>):  $\delta$  2.67 (s, 3H, -CH<sub>3</sub>), 7.98–8.12 (m, 6H, Ar-H), 8.38 (d, J = 8.4 Hz, 2H, Ar-H); <sup>13</sup>C NMR (75 MHz, CDCl<sub>3</sub>):  $\delta$  26.8, 123.4, 123.6, 124.7, 129.4, 139.3, 149.1, 154.4, 155.2, 197.1; Anal. calcd. for C<sub>14</sub>H<sub>11</sub>N<sub>3</sub>O<sub>3</sub>; C: 62.45; H: 4.12; N: 15.61. Found: C: 62.40; H: 4.15; N: 15.58.

**Ethyl 4-((4-Nitrophenyl)diazanyl)benzoate (4u):** Red solid (71%), mp. 164 °C (CDCl<sub>3</sub>); IR (KBr,  $\nu$  cm<sup>-1</sup>): 1705, 1523, 1351, 1266, 1098, 903; <sup>1</sup>H NMR (300 MHz, CDCl<sub>3</sub>):  $\delta$  1.45 (t, J = 7.0 Hz, 3H, -CH<sub>3</sub>), 4.42 (q, J = 7.0 Hz, 2H, -OCH<sub>2</sub>), 7.96 (d, J = 9.0 Hz, 2H, Ar-H), 8.04 (d, J = 8.7 Hz, 2H, Ar-H), 8.21 (d, J = 8.7 Hz, 2H, Ar-H), 8.36 (d, J = 9.0 Hz, 2H, Ar-H); <sup>13</sup>C NMR (75 MHz, CDCl<sub>3</sub>):  $\delta$  14.4, 61.4, 123.0, 123.5, 124.6, 130.5, 133.6, 148.9, 154.4, 155.2, 165.5; Anal. calcd. for C<sub>15</sub>H<sub>13</sub>N<sub>3</sub>O<sub>4</sub>; C: 60.20; H: 4.38; N: 14.04. Found: C: 60.15; H: 4.36; N: 14.07.

**Ethyl 4-((4-bromophenyl)diazanyl)benzoate (4v):** Orange solid (73%), mp. 188 °C (CDCl<sub>3</sub>); IR (KBr,  $\nu$  cm<sup>-1</sup>): 3433, 1711, 1269, 1110, 998; <sup>1</sup>H NMR (300 MHz, CDCl<sub>3</sub>):  $\delta$  1.44 (t, J = 7.2 Hz, 3H, -CH<sub>3</sub>), 4.44 (q, J = 7.1 Hz, 2H, -OCH<sub>2</sub>), 7.66 (d, J = 8.7 Hz, 2H, Ar-H), 7.83 (d, J = 8.4 Hz, 2H, Ar-H), 7.95 (d, J = 8.4 Hz, 2H, Ar-H), 8.21 (d, J = 8.4 Hz, 2H, Ar-H); <sup>13</sup>C NMR (75 MHz, CDCl<sub>3</sub>):  $\delta$  166.0, 154.8, 151.1, 132.4, 130.5, 126.2, 124.6, 122.8, 61.3, 14.3; Anal. calcd. for C<sub>15</sub>H<sub>13</sub>BrN<sub>2</sub>O<sub>2</sub>; C: 54.07; H: 3.93; N: 8.41. Found: C: 54.04; H: 3.95; N: 8.43.

**1-(4-Acetylphenyl)-2-phenyldiazene (4w):** Red solid (87%), mp. 100 °C (CDCl<sub>3</sub>); IR (KBr,  $\nu$  cm<sup>-1</sup>): 2930, 1671, 1361, 1263, 1010; <sup>1</sup>H NMR (300 MHz, CDCl<sub>3</sub>):  $\delta$  2.65 (s, 3H, -CH<sub>3</sub>), 7.51–7.57 (m, 3H, Ar-H), 7.91–7.98 (m, 4H, Ar-H), 8.11 (d, J = 8.7 Hz, 2H, Ar-H); <sup>13</sup>C NMR (75 MHz, CDCl<sub>3</sub>):  $\delta$  26.7, 122.8, 123.0, 129.1, 129.3, 131.7, 138.3, 152.6, 155.1, 197.4; Anal. calcd. for C<sub>14</sub>H<sub>12</sub>ClN<sub>2</sub>O; C: 74.98; H: 5.39; N: 12.49. Found: C: 74.93; H: 5.42; N: 12.46.

**1-(4-Methoxyphenyl)-2-*p*-tolylidiazene (4x):** Orange solid (70%), mp. 104 °C (CDCl<sub>3</sub>); IR (KBr,  $\nu$  cm<sup>-1</sup>): 3428, 2930, 1600, 1503, 1256; <sup>1</sup>H NMR (300 MHz, CDCl<sub>3</sub>):  $\delta$  2.35 (s, 3H, -CH<sub>3</sub>), 3.80 (s, 3H, -OCH<sub>3</sub>), 6.91–6.94 (m, 2H, Ar-H), 7.22 (d, J = 8.1 Hz, 2H, Ar-H), 7.71 (d, J = 8.4 Hz, 2H, Ar-H), 7.81–7.84 (m, 2H, Ar-H); <sup>13</sup>C NMR (75 MHz, CDCl<sub>3</sub>):  $\delta$  21.4, 55.5, 114.1, 122.6, 124.6, 129.7, 140.8, 147.2, 150.9, 161.8; Anal. calcd. for C<sub>14</sub>H<sub>14</sub>N<sub>2</sub>O; C: 74.31; H: 6.24; N: 12.38. Found: C: 74.27; H: 6.26; N: 12.35.

**(*E*)-1-(Phenyl)-2-*p*-tolylidiazene (4y):** Orange solid (68%), mp. 54 °C (CDCl<sub>3</sub>); IR (KBr,  $\nu$  cm<sup>-1</sup>): 3005, 1709, 1622, 1315, 1032, 943; <sup>1</sup>H NMR (300 MHz, CDCl<sub>3</sub>):  $\delta$  2.42 (s, 3H, -CH<sub>3</sub>), 7.28 (d, J = 8.1 Hz, 2H, Ar-H), 7.42–7.51 (m, 3H, Ar-H), 7.81 (d, J = 8.4 Hz, 2H, Ar-H), 7.86–7.90 (m, 2H, Ar-H); <sup>13</sup>C NMR (75 MHz, CDCl<sub>3</sub>):  $\delta$  152.7, 150.7, 141.6, 130.7, 129.7, 129.0, 122.8, 122.7, 21.6; Anal. calcd. for C<sub>13</sub>H<sub>12</sub>N<sub>2</sub>; C: 79.56; H: 6.16; N: 14.27; Found: C: 79.50; H: 6.08; N: 14.22. Found: C: 64.31; H: 5.04; N: 4.61.

**1-(4-Methoxyphenyl)-2-phenyldiazene (4z):** Orange solid (66%), mp. 72 °C (CDCl<sub>3</sub>); IR (KBr,  $\nu$  cm<sup>-1</sup>):

S6

2919, 2856, 1598, 1254, 1033; <sup>1</sup>H NMR (300 MHz, CDCl<sub>3</sub>):  $\delta$  3.89 (s, 3H, -CH<sub>3</sub>), 7.02 (d, J = 8.4 Hz, 2H, Ar-H), 7.42-7.54 (m, 3H, Ar-H), 7.89 (d, J = 7.2 Hz, 2H, Ar-H), 7.94 (d, J = 8.7 Hz, 2H, Ar-H); <sup>13</sup>C NMR (75 MHz, CDCl<sub>3</sub>):  $\delta$  162.1, 152.9, 147.2, 130.3, 129.1, 124.8, 122.6, 114.3, 55.6; Anal. calcd. for C<sub>13</sub>H<sub>12</sub>N<sub>2</sub>O; C: 73.56; H: 5.70; N: 13.20. Found: C: 73.60; H: 5.71; N: 13.18.

**1-(4-Bromophenyl)-2-(4-isopropylphenyl)-diazene (4a’):** Reddish yellow solid (66%), mp. 208 °C (CDCl<sub>3</sub>); IR (KBr,  $\nu$  cm<sup>-1</sup>): 2993, 2209, 1535, 1415, 1146, 971; <sup>1</sup>H NMR (300 MHz, CDCl<sub>3</sub>):  $\delta$  1.18-1.29 (m, 6H, -CH<sub>3</sub>), 2.92-2.99 (m, 1H, -CH), 7.34 (t, J = 8.1 Hz, 2H, Ar-H), 7.57-7.62 (m, 2H, Ar-H), 7.72-7.84 (m, 4H, Ar-H); <sup>13</sup>C NMR (75 MHz, CDCl<sub>3</sub>):  $\delta$  23.8, 34.2, 123.0, 124.2, 124.4, 124.9, 127.2, 132.2, 132.4, 150.9, 151.5, 152.8; Anal. calcd. for C<sub>15</sub>H<sub>15</sub>BrN<sub>2</sub>; C: 59.42; H: 4.99; N: 9.24. Found: C: 59.50; H: 4.97; N: 9.20.

**1-(4-Bromophenyl)-2-(4-tert-butylphenyl)-diazene (4b’):** Orange solid (48%), mp. 216 °C (CDCl<sub>3</sub>); IR (KBr,  $\nu$  cm<sup>-1</sup>): 2980, 2210, 1553, 1413, 1201, 1021; <sup>1</sup>H NMR (300 MHz, CDCl<sub>3</sub>):  $\delta$  1.21-1.33 (m, 9H, -CH<sub>3</sub>), 7.59-7.79 (m, 8H, Ar-H); <sup>13</sup>C NMR (75 MHz, CDCl<sub>3</sub>):  $\delta$  31.2, 34.1, 122.8, 124.2, 126.0, 132.2, 138.3, 151.5, 152.0, 155.0; Anal. calcd. for C<sub>16</sub>H<sub>17</sub>BrN<sub>2</sub>; C: 60.58; H: 5.40; N: 8.83. Found: C: 60.64; H: 5.42; N: 8.79.

## 7. Spectral and Analytical Data of the homo-products:

**(E)-1,2-Di-p-tolyldiazene (5a):** Orange solid (96%), mp. 132 °C (CDCl<sub>3</sub>); IR (KBr,  $\nu$  cm<sup>-1</sup>): 2931, 1598, 1501, 1160, 1109, 945; <sup>1</sup>H NMR (300 MHz, CDCl<sub>3</sub>):  $\delta$  2.35 (s, 6H, -CH<sub>3</sub>), 7.23 (d, 4H, J = 8.1 Hz, Ar-H), 7.74 (d, 4H, J = 8.1 Hz, Ar-H); <sup>13</sup>C NMR (75 MHz, CDCl<sub>3</sub>):  $\delta$  21.1, 122.4, 129.3, 140.8, 150.5; Anal. calcd. for C<sub>14</sub>H<sub>14</sub>N<sub>2</sub>; C: 79.97; H: 6.71; N: 13.32. Found: C: 79.90; H: 6.74; N: 13.36.

**(E)-1,2-Di-m-tolyldiazene (5b):** Reddish yellow solid (94%), mp. 128 °C (CDCl<sub>3</sub>); IR (KBr,  $\nu$  cm<sup>-1</sup>): 2979, 1709, 1541, 1488, 1161, 931, 832; <sup>1</sup>H NMR (300 MHz, CDCl<sub>3</sub>):  $\delta$  2.50 (s, 6H, -CH<sub>3</sub>), 7.28 - 7.32 (m, 2H, Ar-H), 7.37 - 7.40 (m, 2H, Ar-H), 7.80 - 7.86 (m, 4H, Ar-H); <sup>13</sup>C NMR (75 MHz, CDCl<sub>3</sub>):  $\delta$  152.8, 139.1, 131.8, 129.1, 122.9, 120.6, 21.4; Anal. calcd. for C<sub>14</sub>H<sub>14</sub>N<sub>2</sub>; C: 79.97; H: 6.71; N: 13.32. Found: C: 79.99; H: 6.70; N: 13.35.

**(E)-1,2-Di-o-tolyldiazene (5c):** Reddish yellow solid (94%), mp. 134 °C (CDCl<sub>3</sub>); IR (KBr,  $\nu$  cm<sup>-1</sup>): 2968, 1708, 1496, 1397, 1156, 935; <sup>1</sup>H NMR (300 MHz, CDCl<sub>3</sub>):  $\delta$  2.65 (s, 6H, -CH<sub>3</sub>), 7.15-7.26 (m, 6H, Ar-H), 7.53 (d, J = 7.8 Hz, 2H, Ar-H); <sup>13</sup>C NMR (75 MHz, CDCl<sub>3</sub>):  $\delta$  151.1, 138.0, 131.2, 130.6, 126.3, 115.8, 17.6; Anal. calcd. for C<sub>14</sub>H<sub>14</sub>N<sub>2</sub>; C: 79.97; H: 6.71; N: 13.32. Found: C: 79.93; H: 6.73; N: 13.28.

**(E)-1,2-Diphenyldiazene (5d):** Reddish yellow solid (96%), mp. 65 °C (CDCl<sub>3</sub>); IR (KBr,  $\nu$  cm<sup>-1</sup>): 1582, 1501, 1456, 1308, 1067, 923; <sup>1</sup>H NMR (300 MHz, CDCl<sub>3</sub>):  $\delta$  7.42-7.51 (m, 6H, Ar-H), 7.88-7.93 (m, 4H, Ar-H); <sup>13</sup>C NMR (75 MHz, CDCl<sub>3</sub>):  $\delta$  122.7, 129.0, 130.8, 152.5; Anal. calcd. for C<sub>12</sub>H<sub>10</sub>N<sub>2</sub>; C: 71.10; H: 5.53; N: 15.37. Found: C: 71.05; H: 5.55; N: 15.40.

**(E)-1,2-Bis(4-methoxyphenyl)diazene (5e):** Reddish yellow solid (93%), mp. 150 °C (CDCl<sub>3</sub>); IR (KBr,  $\nu$  cm<sup>-1</sup>): 2930, 1731, 1578, 1251, 1142, 1105, 1035, 956; <sup>1</sup>H NMR (300 MHz, CDCl<sub>3</sub>):  $\delta$  3.76 (s, 6H, -OCH<sub>3</sub>), 6.90 (d, 4H, J = 8.4 Hz, Ar-H), 7.79 (d, 4H, J = 8.4 Hz, Ar-H); <sup>13</sup>C NMR (75 MHz, CDCl<sub>3</sub>):  $\delta$  55.5, 114.1, 124.3, 147.1, 161.6; Anal. calcd. for C<sub>14</sub>H<sub>14</sub>N<sub>2</sub>O<sub>2</sub>; C: 79.97; H: 6.71; N: 13.32. Found: C: 79.93; H: 6.69; N: 13.31.

**(E)-1,2-Bis(4-bromophenyl)diazene (5f):** Red solid (90%), mp. 196 °C (CDCl<sub>3</sub>); IR (KBr,  $\nu$  cm<sup>-1</sup>): 1729, 1572, 1463, 1401, 1271, 1058, 1008; <sup>1</sup>H NMR (300 MHz, CDCl<sub>3</sub>):  $\delta$  7.56-7.59 (m, 4H, Ar-H), 7.71-7.74 (m, 4H, Ar-H); <sup>13</sup>C NMR (75 MHz, CDCl<sub>3</sub>):  $\delta$  124.4, 125.8, 132.4, 151.2; Anal. calcd. for C<sub>12</sub>H<sub>8</sub>Br<sub>2</sub>N<sub>2</sub>;

C: 42.39; H: 2.37; N: 8.24. Found: C: 42.33; H: 2.41; N: 8.27.

S7

**(E)-1,2-Bis(4-chlorophenyl)diazene (5g):** Orange solid (91%), mp. 183 °C (CDCl<sub>3</sub>); IR (KBr,  $\nu$  cm<sup>-1</sup>): 1569, 1483, 1112, 1085, 1010; <sup>1</sup>H NMR (300 MHz, CDCl<sub>3</sub>):  $\delta$  7.40-7.43 (m, 4H, Ar-H), 7.78-7.80 (m, 4H, Ar-H); <sup>13</sup>C NMR (75 MHz, CDCl<sub>3</sub>):  $\delta$  124.1, 129.3, 137.1, 150.6; Anal. calcd. for C<sub>12</sub>H<sub>8</sub>Cl<sub>2</sub>N<sub>2</sub>; C: 57.40; H: 3.21; N: 11.16. Found: C: 57.34; H: 3.19; N: 11.14.

**(E)-1,2-Bis(3-chlorophenyl)diazene (5h):** Orange solid (88%), mp. 99 °C (CDCl<sub>3</sub>); IR (KBr,  $\nu$  cm<sup>-1</sup>): 1585, 1569, 1466, 1203, 1061; <sup>1</sup>H NMR (300 MHz, CDCl<sub>3</sub>):  $\delta$  7.42-7.44 (m, 4H, Ar-H), 7.66-7.82 (m, 4H, Ar-H); <sup>13</sup>C NMR (75 MHz, CDCl<sub>3</sub>):  $\delta$  121.8, 122.5, 130.0, 131.0, 135.1, 152.9; Anal. calcd. for C<sub>12</sub>H<sub>8</sub>Cl<sub>2</sub>N<sub>2</sub>; C: 57.40; H: 3.21; N: 11.16. Found: C: 57.47; H: 3.21; N: 11.11.

**(E)-1,2-Bis(2,4-dimethylphenyl)diazene (5i):** Orange solid (92%), mp. 232 °C (EtOAc); IR (KBr,  $\nu$  cm<sup>-1</sup>): 3004, 1713, 1622, 1444, 1249, 1135, 952, 743; <sup>1</sup>H NMR (300 MHz, CDCl<sub>3</sub>):  $\delta$  2.23 (s, 6H, Ar-H), 2.25 (s, 6H, Ar-H), 7.16 (d, J = 7.8 Hz, 2H, Ar-H), 7.55-7.60 (m, 4H, Ar-H); <sup>13</sup>C NMR (75 MHz, CDCl<sub>3</sub>):  $\delta$  19.9, 120.8, 123.4, 130.2, 130.2, 137.4, 139.9, 151.2; Anal. calcd. for C<sub>16</sub>H<sub>18</sub>N<sub>2</sub>; C: 80.63; H: 7.61; N: 11.75. Found: C: 80.69; H: 7.58; N: 11.71.

**(E)-Diethyl 4,4'-(diazene-1,2-diyl)dibenzoate (5j):** red solid (86%), mp. 162 °C (CDCl<sub>3</sub>); IR (KBr,  $\nu$  cm<sup>-1</sup>): 3409, 1726, 1275, 1101; <sup>1</sup>H NMR (300 MHz, CDCl<sub>3</sub>):  $\delta$  1.44 (t, J = 7.0 Hz, 6H, -CH<sub>3</sub>), 4.44 (q, J = 7.1 Hz, 4H, -OCH<sub>2</sub>), 7.98 (d, J = 8.4 Hz, 4H, Ar-H), 8.23 (d, J = 8.4 Hz, 4H, Ar-H); <sup>13</sup>C NMR (75 MHz, CDCl<sub>3</sub>):  $\delta$  165.8, 154.7, 132.6, 130.5, 122.8, 61.3, 14.4; Anal. calcd. for C<sub>18</sub>H<sub>18</sub>N<sub>2</sub>O<sub>4</sub>; C: 66.25; H: 5.56; N: 8.58. Found: C: 66.31; H: 5.57; N: 8.55.

**(E)-1,2-Bis(4-acetylphenyl)diazene (5k):** Red solid (88%), mp. 210 °C (CDCl<sub>3</sub>); IR (KBr,  $\nu$  cm<sup>-1</sup>): 1668, 1411, 1361, 1305, 1263, 1231, 1112, 1001, 972; <sup>1</sup>H NMR (300 MHz, CDCl<sub>3</sub>):  $\delta$  2.69 (s, 6H, -CH<sub>3</sub>), 8.03 (d, 4H, J = 8.4 Hz, Ar-H), 8.14 (d, 4H, J = 8.4 Hz, Ar-H); <sup>13</sup>C NMR (75 MHz, CDCl<sub>3</sub>):  $\delta$  27.1, 123.2, 129.3, 138.8, 154.6, 197.2; Anal. calcd. for C<sub>16</sub>H<sub>14</sub>N<sub>2</sub>O<sub>2</sub>; C: 72.16; H: 5.30; N: 10.52. Found: C: 72.11; H: 5.33; N: 10.55.

**(E)-1,2-Bis(4-nitrophenyl)diazene (5l):** Orange solid (83%), mp. 222 °C (EtOAc); IR (KBr,  $\nu$  cm<sup>-1</sup>): 1608, 1533, 1344, 1319, 1209, 1105, 1002; <sup>1</sup>H NMR (300 MHz, CDCl<sub>3</sub>):  $\delta$  8.13 (d, 4H, J = 8.4 Hz, Ar-H), 8.45 (d, 4H, J = 8.4 Hz, Ar-H); <sup>13</sup>C NMR (75 MHz, CDCl<sub>3</sub>):  $\delta$  123.8, 124.7, 149.2, 154.8; Anal. calcd. for C<sub>12</sub>H<sub>8</sub>N<sub>4</sub>O<sub>4</sub>; C: 52.95; H: 2.96; N: 20.58. Found: C: 53.02; H: 2.95; N: 20.61.

**(E)-1,2-Bis(3-nitrophenyl)diazene (5m):** Orange solid (85%), mp. 154 °C (CDCl<sub>3</sub>); IR (KBr,  $\nu$  cm<sup>-1</sup>): 1530, 1352, 1317, 1077, 923; <sup>1</sup>H NMR (300 MHz, CDCl<sub>3</sub>):  $\delta$  7.74 (t, 2H, J = 8.1, Ar-H), 8.34 (dd, 2H, J = 8.1, 1.2 Hz, Ar-H), 8.41 (dd, 2H, J = 8.1, 1.2 Hz, Ar-H), 8.78 (s, 2H, Ar-H); <sup>13</sup>C NMR (75 MHz, CDCl<sub>3</sub>):  $\delta$  117.1, 125.8, 129.6, 130.2, 148.9, 152.2; Anal. calcd. for C<sub>12</sub>H<sub>8</sub>N<sub>4</sub>O<sub>4</sub>; C: 52.95; H: 2.96; N: 20.58. Found: C: 53.00; H: 2.97; N: 20.52.

**(E)-1,2-Bis(4-isopropylphenyl)diazene (5n):** Orange solid (86%), mp. 146 °C (CDCl<sub>3</sub>); IR (KBr,  $\nu$  cm<sup>-1</sup>): 2933, 1602, 1501, 1171, 1112, 958; <sup>1</sup>H NMR (300 MHz, CDCl<sub>3</sub>):  $\delta$  1.19-1.22 (m, 12H, -CH<sub>3</sub>), 2.84-2.93 (m, 2H, -CH), 7.26 (d, J = 8.4, 4H, Ar-H), 7.76 (d, J = 8.1, 4H, Ar-H); <sup>13</sup>C NMR (75 MHz, CDCl<sub>3</sub>):  $\delta$  23.8, 34.1, 122.8, 127.0, 151.2, 152.0; Anal. calcd. for C<sub>18</sub>H<sub>22</sub>N<sub>2</sub>; C: 81.16; H: 8.32; N: 10.52. Found: C: 81.21; H: 8.30; N: 10.49.

**(E)-1,2-Bis(4-tert-butylphenyl)diazene (5o):** Orange solid (84%), mp. 166 °C (CDCl<sub>3</sub>); IR (KBr,  $\nu$  cm<sup>-1</sup>): 2920, 1588, 1499, 1165, 1117, 946; <sup>1</sup>H NMR (300 MHz, CDCl<sub>3</sub>):  $\delta$  1.40-1.65 (m, 18H, -CH<sub>3</sub>), 7.56-7.68 (m, 4H, Ar-H), 7.82-7.90 (m, 4H, Ar-H); <sup>13</sup>C NMR (75 MHz, CDCl<sub>3</sub>):  $\delta$  31.2, 34.9, 122.7, 126.0, 150.8, 154.2; Anal. calcd. for C<sub>20</sub>H<sub>26</sub>N<sub>2</sub>; C: 81.59; H: 8.90; N: 9.51. Found: C: 81.55; H: 8.88; N: 9.52.



8.  $^1\text{H}$  and  $^{13}\text{C}$  -NMR spectra of the cavitand p-tert-Butylcalix[4]arene-tetra-O-acetate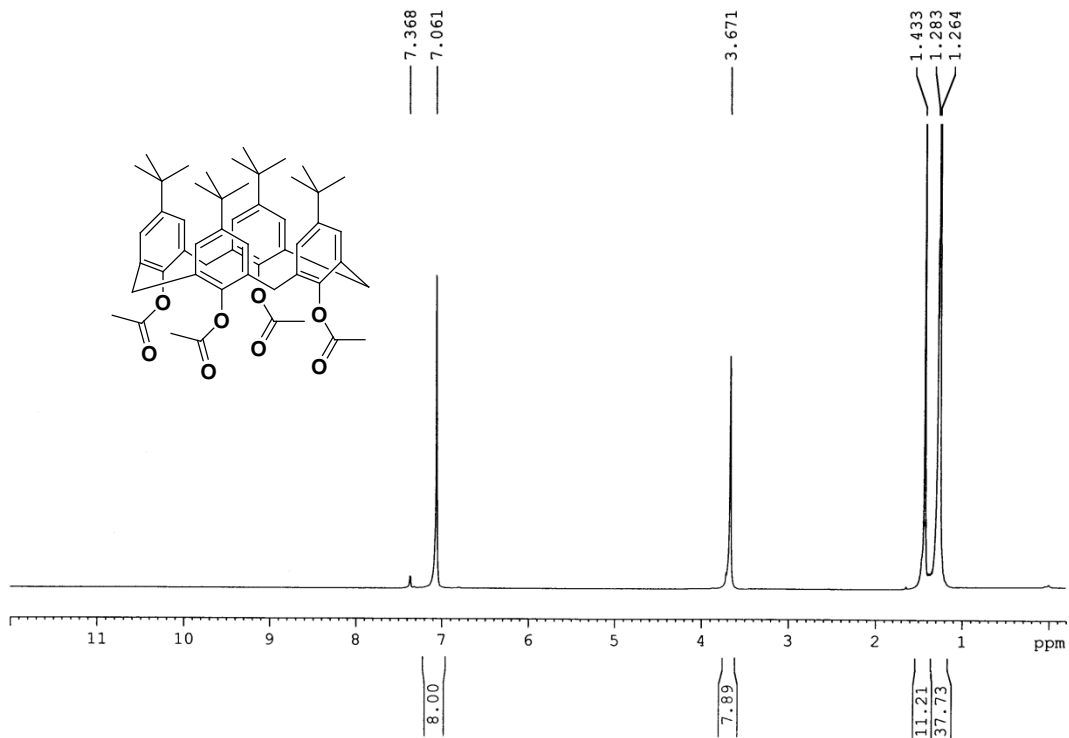

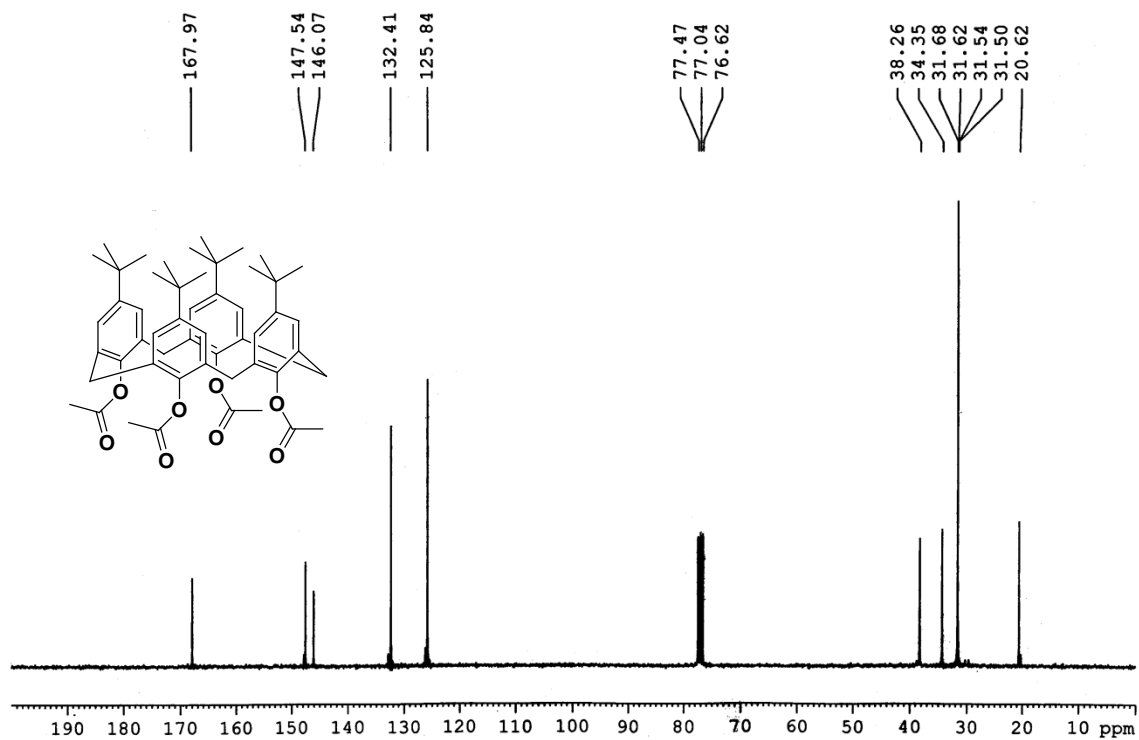

S9

**9. Corresponding <sup>1</sup>H-NMRs of Fig. 1 (Manuscript)** [Stacked <sup>1</sup>H NMR spectra (CDCl<sub>3</sub>, room temperature; 303 K) of the guest *p*-toluidine, the host calix[4]acetate, and silver ion with *p*-toluidine ⊂ calix[4]acetate]

***p*-Toluidine**

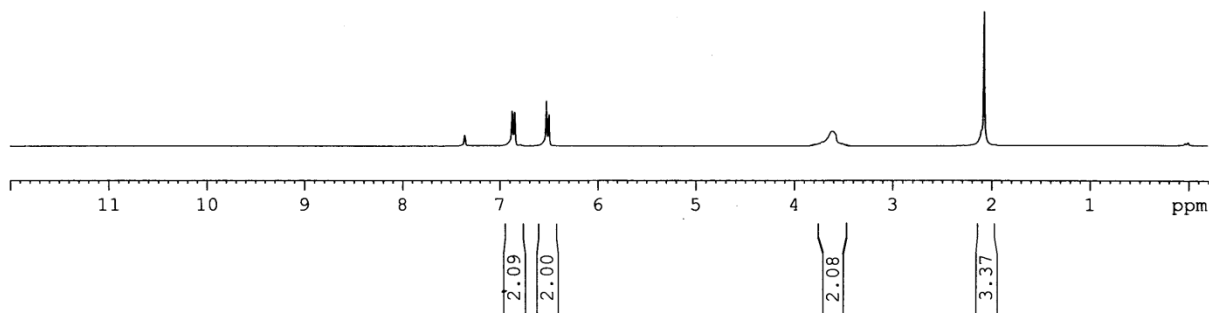

**Calix[4]acetate**

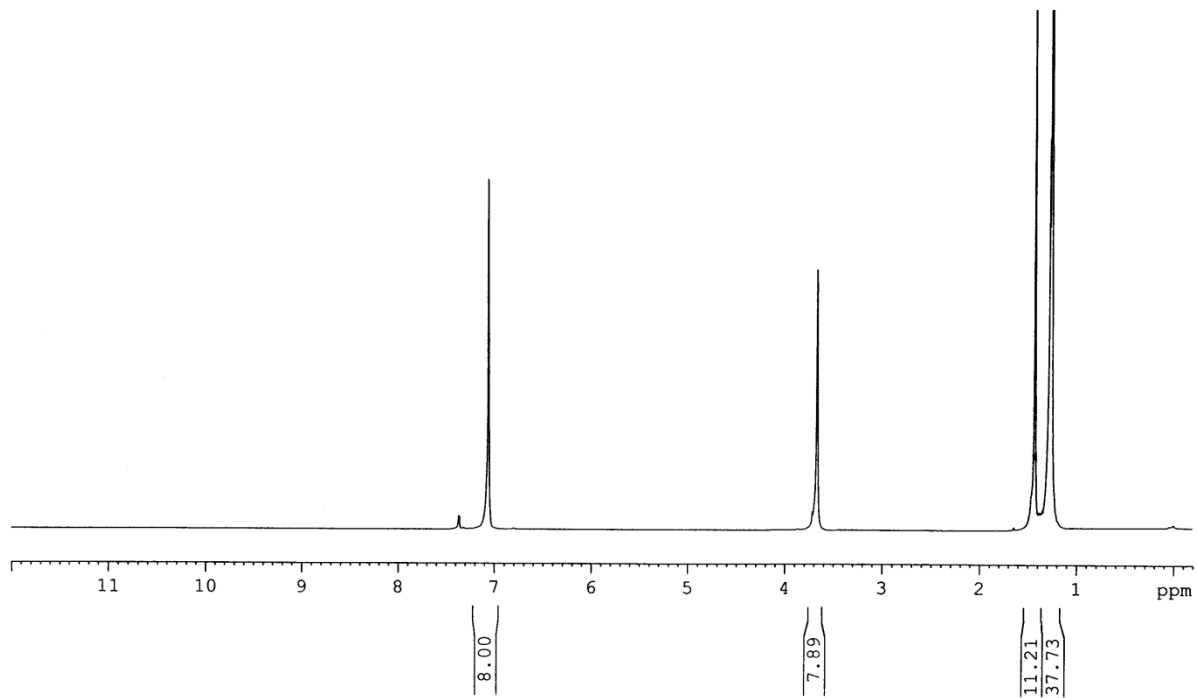

S10

**p-Toluidine** ⊂ **Calix[4]acetate**

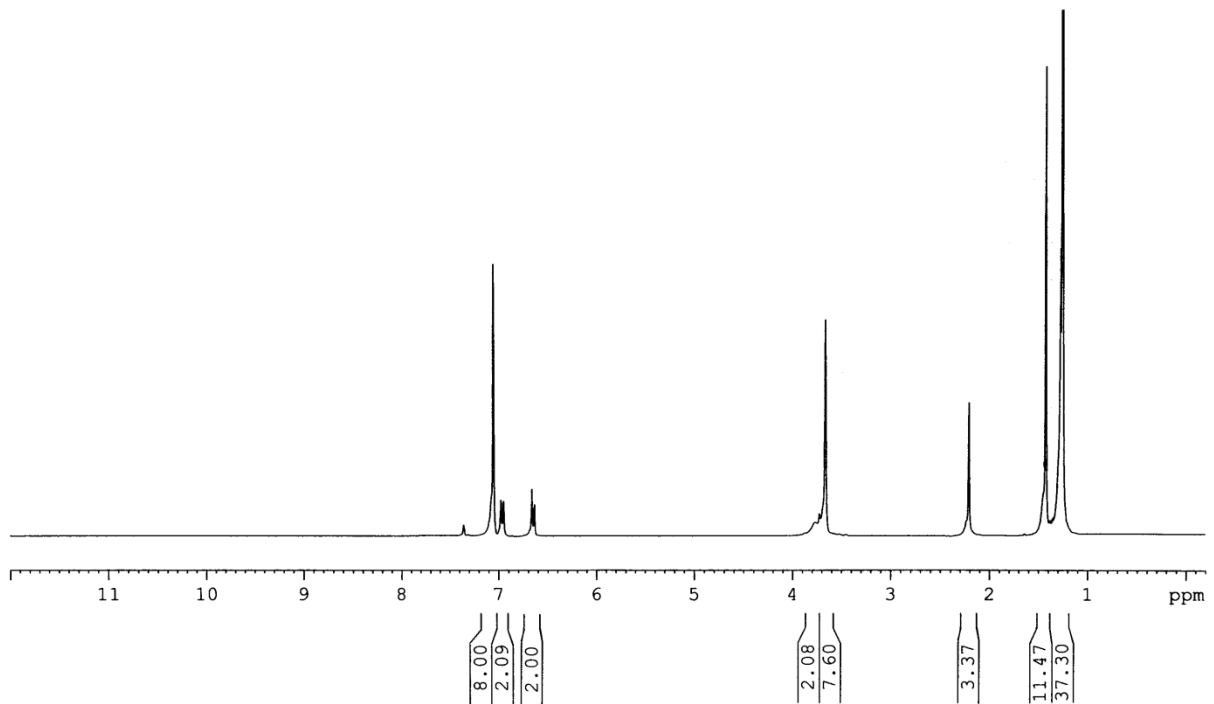

Silver Ion with p-Toluidine  $\subset$  Calix[4]acetate

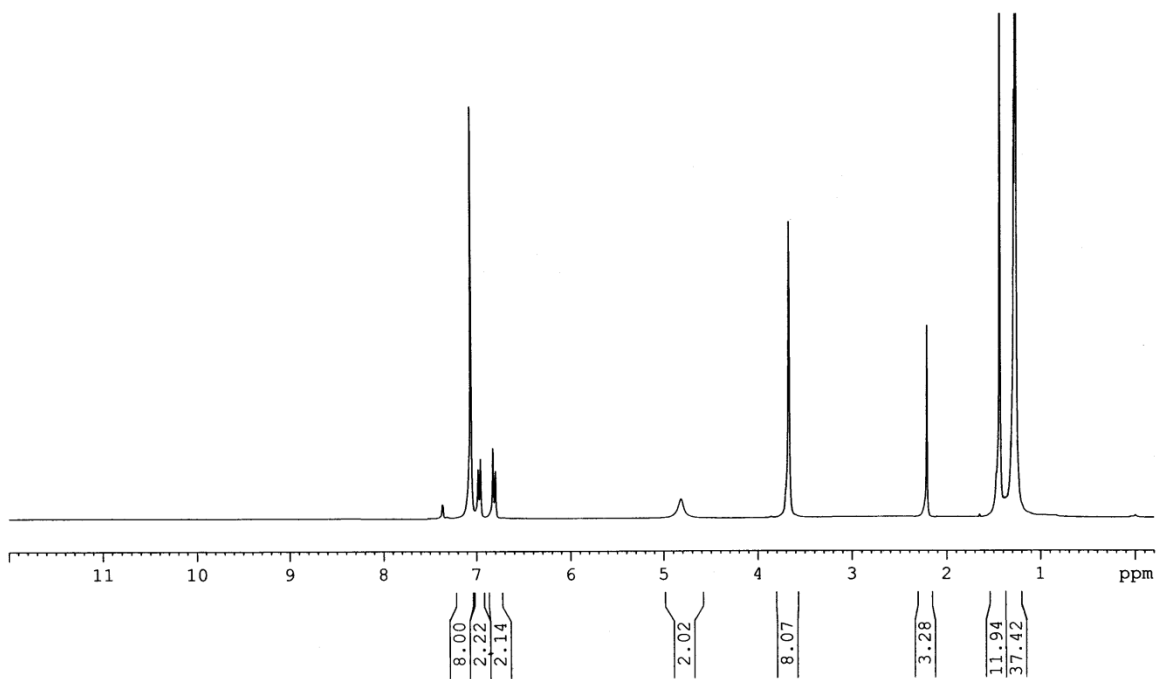

S11

10.  $^1\text{H}$ ,  $^{13}\text{C}$  NMR and TEM of recovered catalyst after five times recycled:

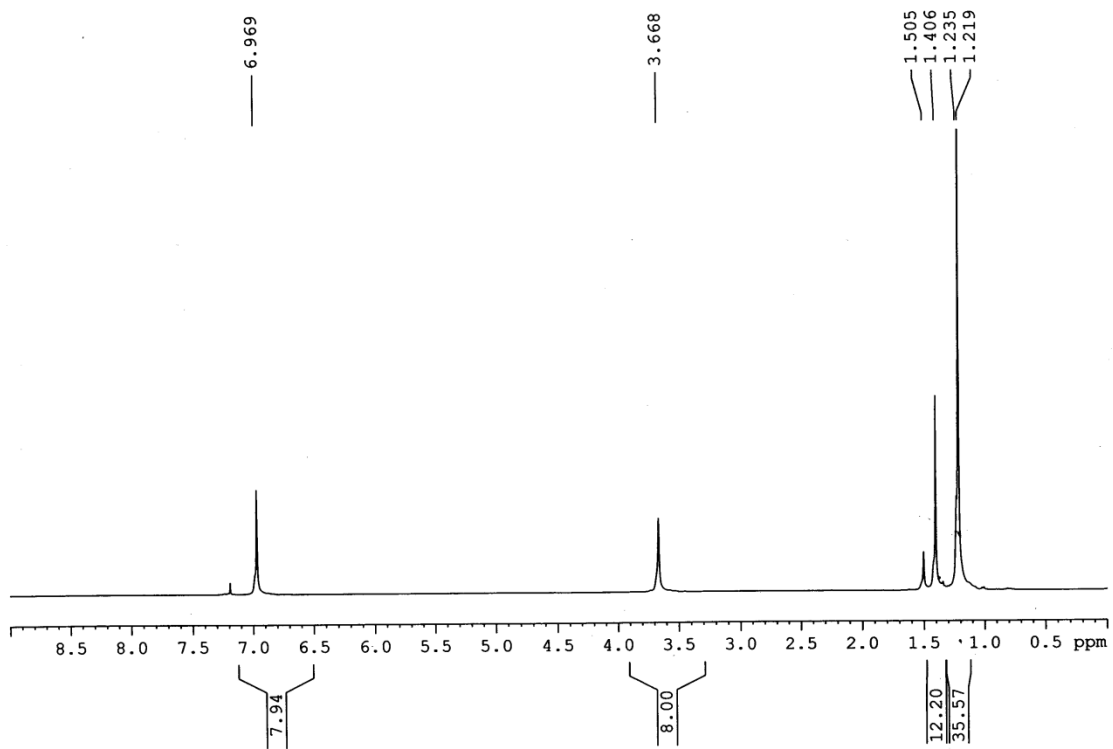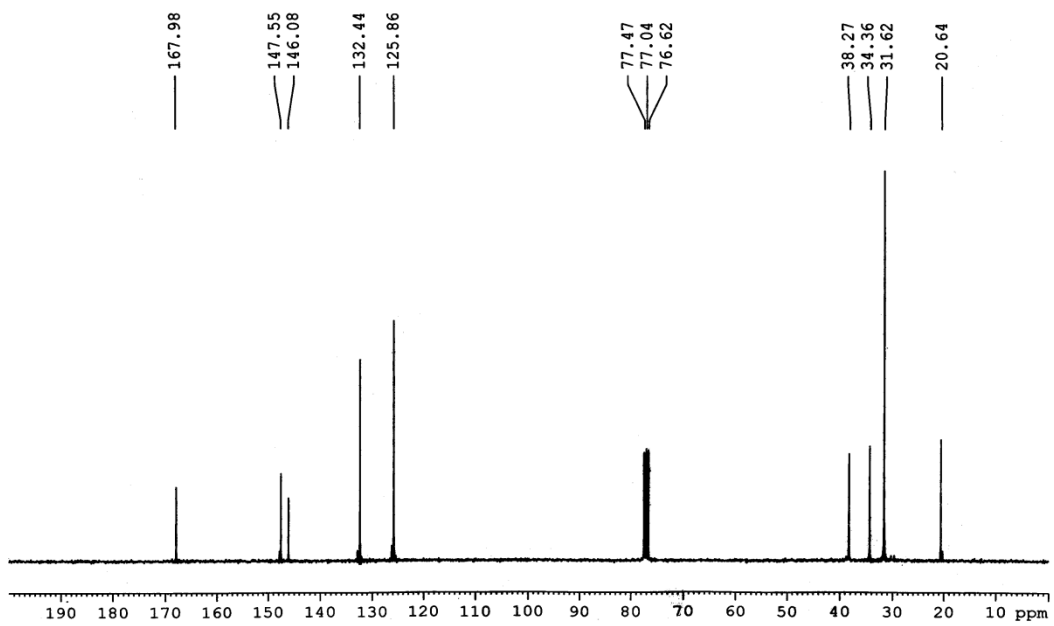

S12

TEM Image

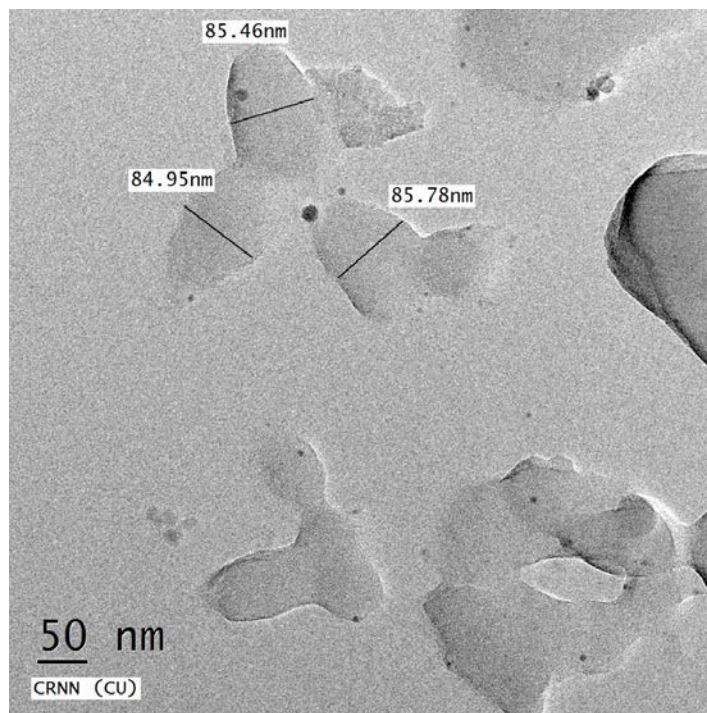

Supplement: c5gc01859e1.pdf [file c5gc01859e1.pdf]
